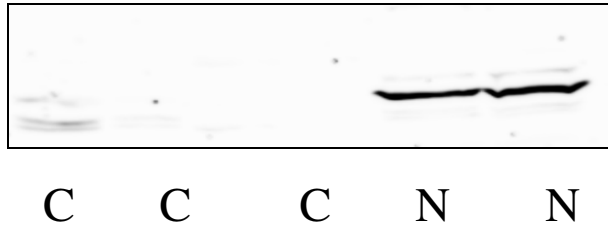

**Fig. S1.** Representative western blot of cytosolic and nuclear hepatic tissue fractions blotted with anti-Lamin B antibody. C, cytosolic fraction; N, nuclear fraction.

>

 [ref|NM\\_010478.2|](#) **UEGM** Mus musculus heat shock protein 1B (Hspa1b), mRNA  
Length=2810

[GENE ID: 15511 Hspa1b](#) | heat shock protein 1B [Mus musculus]  
([Over 100 PubMed links](#))

Score = 411 bits (222), Expect = 1e-112  
Identities = 256/273 (94%), Gaps = 2/273 (1%)  
Strand=Plus/Minus

```

Query 1 ACC-GCCGGTTGTTTTANGTCCTCGCCGCCAGGTGCGTGTGCGCCCGCGTGGCCTTCAC 59
      ||| ||||| | | ||||| || ||||| ||||| ||||| ||||| ||||| ||||| |||||
Sbjct 944 ACCAGCCGGTTG-TCGAAGTCCTCCCCTCCCAGGTGCGTGTGCGCCCGCGTGGCCTTCAC 886

Query 60 CTCGAAGATGCCGTCGTCGATGGTCAGGATGGACACGTCGAACGTGCCGCCCCCAGGTC 119
      ||||| ||||| ||||| ||||| ||||| ||||| ||||| ||||| ||||| ||||| |||||
Sbjct 885 CTCGAAGATGCCGTCGTCGATCGTCAGGATGGACACGTCGAACGTGCCGCCCCCAGGTC 826

Query 120 GAAGATGAGCACGTTGCGCTCCCCCTTGCCAGAGCGGTCCAGCCGTAGGCGATGGCGGC 179
      ||||| ||||| ||||| ||||| ||||| ||||| ||||| ||||| ||||| ||||| |||||
Sbjct 825 GAAGATGAGCACGTTGCGCTCGCCCTTGCCGGTCCAGCCGTAGGCGATGGCGGC 766

Query 180 CGCCGTGGGCTCGTTGATGATGCGCAGCACGTTGAGTCCCAGCATCACGCCCGCGTCTTT 239
      ||||| ||||| ||||| ||||| ||||| ||||| ||||| ||||| ||||| ||||| |||||
Sbjct 765 CGCCGTGGGCTCGTTGATGATCCGACGACGTTAGACCGGCGATCACGCCCGCGTCTTT 706

Query 240 GGTGGCTGCCGCTGAGAGTCGTTGAAGTAGGC 272
      ||||| ||||| ||||| ||||| ||||| ||||| ||||| ||||| ||||| ||||| |||||
Sbjct 705 GGTGGCTGCCGCTGAGAGTCGTTGAAGTAGGC 673

```

**Fig. S2.** Nucleotide sequence alignment between *hspa1b* (NM\_010478.2) of house mouse *Mus musculus* and a 300 bp PCR product of a DNA fragment extracted from golden spiny mouse *Acomys russatus* hepatic tissue. The alignment was performed with Basic Local Alignment Search Tool (BLAST) network service from the National Center for Biotechnology Information (Zhang et al., 2000). There is 94% identity between the sequences.
